# Supplementary material
Source: PubMed Central journal article supplement (PMC5883552)
Supplement: mmc1.pdf [file mmc1.pdf]

**Biophysical Journal, Volume 114**

**Supplemental Information**

**Intrinsically Disordered Protein Exhibits Both Compaction and Expansion under Macromolecular Crowding**

**Anthony Banks, Sanbo Qin, Kevin L. Weiss, Christopher B. Stanley, and Huan-Xiang Zhou**

**Table S1.** Mean  $R_g$  values of FlgM from three analysis methods.<sup>a</sup>

| Conc.<br>(mg/ml) | BSA           |               |               | lysozyme      |               |               | Dextran       |               |               | Ficoll        |               |               |
|------------------|---------------|---------------|---------------|---------------|---------------|---------------|---------------|---------------|---------------|---------------|---------------|---------------|
| 0                |               |               |               | 28.5 ±<br>0.5 | 27.8 ±<br>0.4 | 27.8 ±<br>0.2 |               |               |               |               |               |               |
| 75               |               |               |               | 27.0<br>± 2.2 | 26.9<br>± 0.6 | 27.6<br>± 0.2 |               |               |               |               |               |               |
| 100              |               |               |               |               |               |               |               |               |               | 30.0<br>± 0.6 | 27.2<br>± 0.5 | 26.3<br>± 0.1 |
| 120              | 29.3<br>± 0.7 | 26.0<br>± 0.5 | 25.5<br>± 0.1 |               |               |               |               |               |               |               |               |               |
| 130              |               |               |               | 26.2<br>± 1.5 | 27.5<br>± 0.8 | 28.1<br>± 0.2 |               |               |               |               |               |               |
| 150              |               |               |               |               |               |               | 24.7<br>± 1.5 | 23.1<br>± 0.4 | 23.9<br>± 0.7 |               |               |               |
| 190              |               |               |               | 28.1<br>± 1.3 | 26.9<br>± 0.6 | 27.3<br>± 0.4 |               |               |               |               |               |               |
| 220              | 27.0<br>± 1.0 | 25.8<br>± 1.2 | 25.7<br>± 0.3 |               |               |               |               |               |               |               |               |               |
| 250              |               |               |               |               |               |               | 25.1<br>± 0.9 | 24.4<br>± 0.7 | 25.4<br>± 0.7 | 29.7<br>± 1.1 | 27.6<br>± 0.4 | 27.0<br>± 0.1 |
| 320              | 29.1<br>± 0.7 | 28.6<br>± 1.0 | 28.9<br>± 1.1 |               |               |               |               |               |               | 30.9<br>± 1.0 | 28.3<br>± 0.6 | 28.3<br>± 0.4 |
| 400              |               |               |               |               |               |               | 28.3<br>± 0.7 | 26.2<br>± 0.6 | 28.0<br>± 0.4 | 48.6<br>± 3.0 | 40.8<br>± 0.5 | 38.4<br>±     |

<sup>a</sup>In each case, mean  $R_g$  values and errors in Å are given, from left to right, for fitting to the Debye formula, GNOM, and EOM. Errors for Debye and GNOM are fitting errors, whereas errors for EOM are standard deviations calculated using mean  $R_g$  values of 100 lowest- $\chi^2$  subsets of models.

10 20 30 40 50  
MSIDRTSPLK PVSTVQTRET SDTPVQKTRQ EK TSAATSAS VTLSDAQAKL  
60 70 80 90  
MQPGVSDINM ERVEALKTAI R NGELKMDTG KIADSLIREA QSYLQSK

**Figure S1.** Amino-acid sequence of FlgM from *Salmonella typhimurium*.

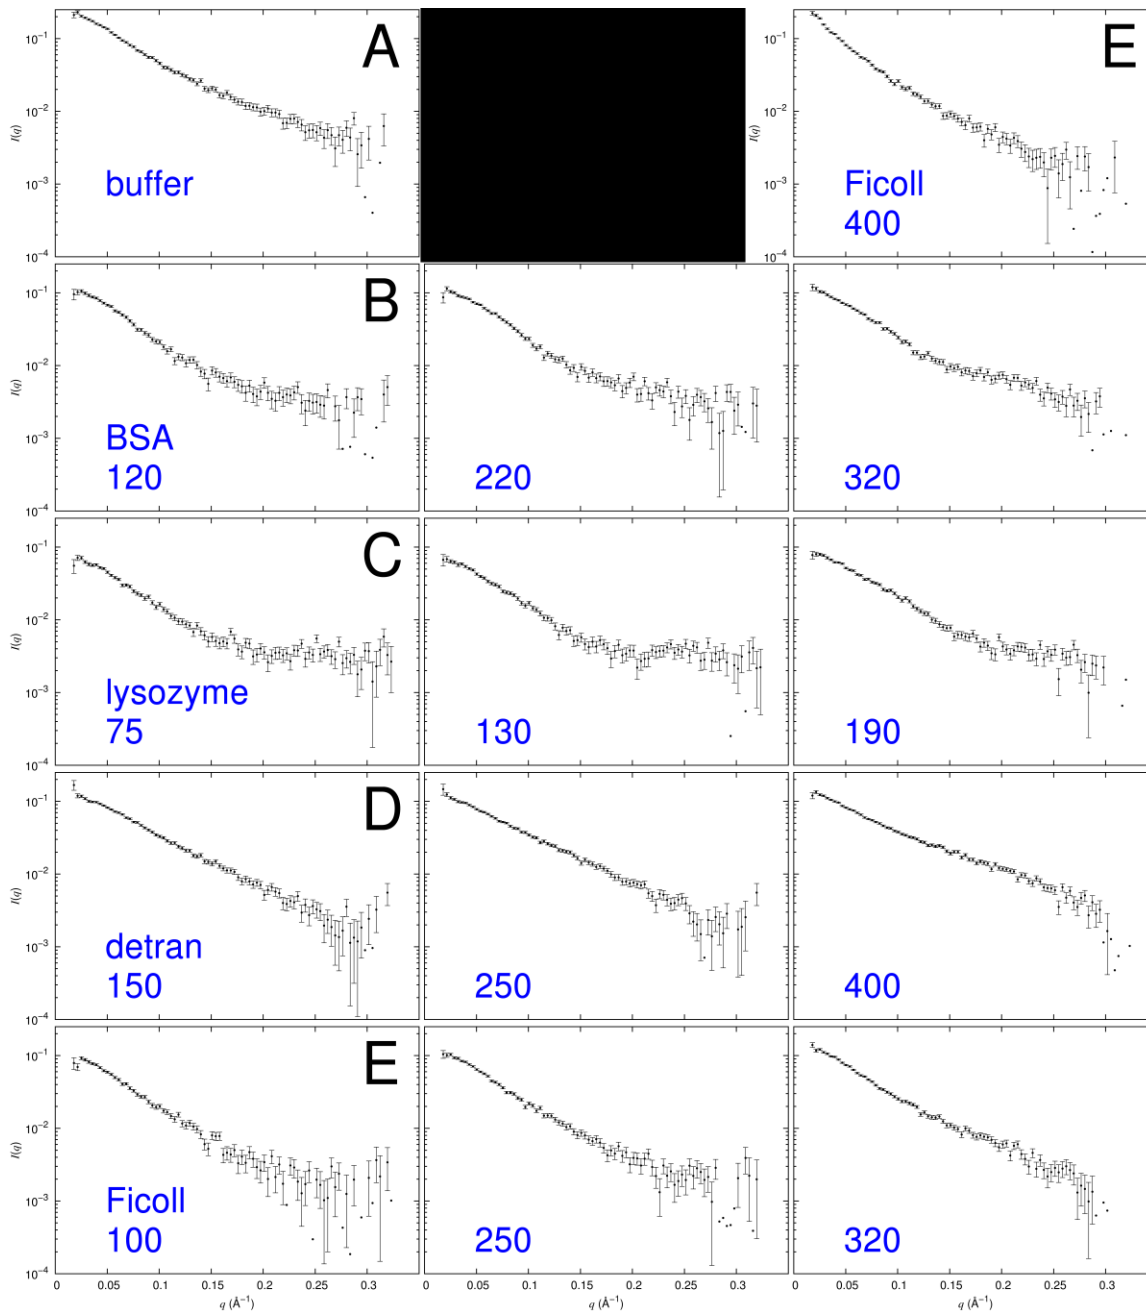

**Figure S2.** Raw scattering data of FlgM in log-log plot. (A) buffer. (B) BSA. (C) Lysozyme. (D) Dextran. (E) Ficoll. The last panel of (E) is shown at the top right. The crowder concentrations in mg/ml are indicated.

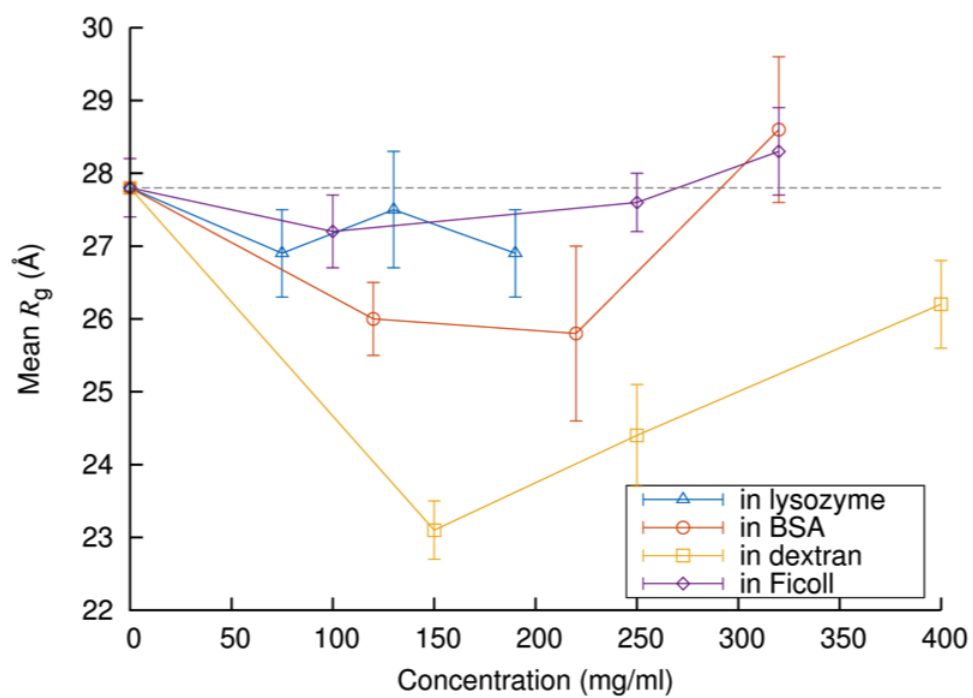

**Figure S3.** Mean  $R_g$  values in buffer and in the four crowders at concentrations up to 400 mg/ml, obtained by GNOM.

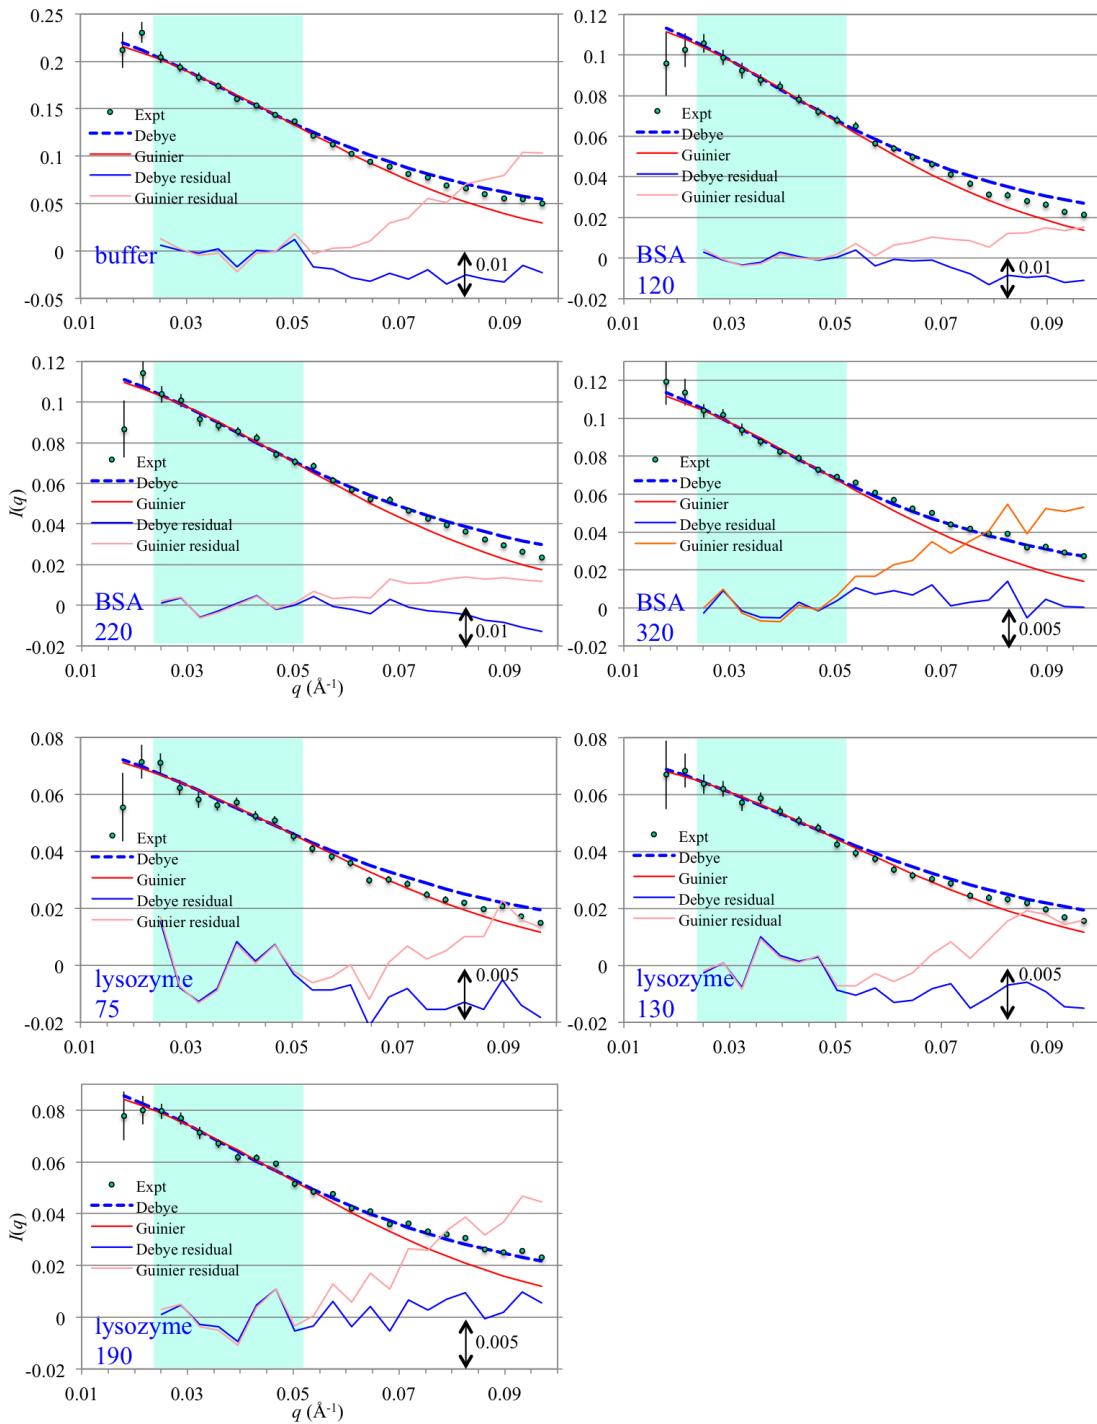

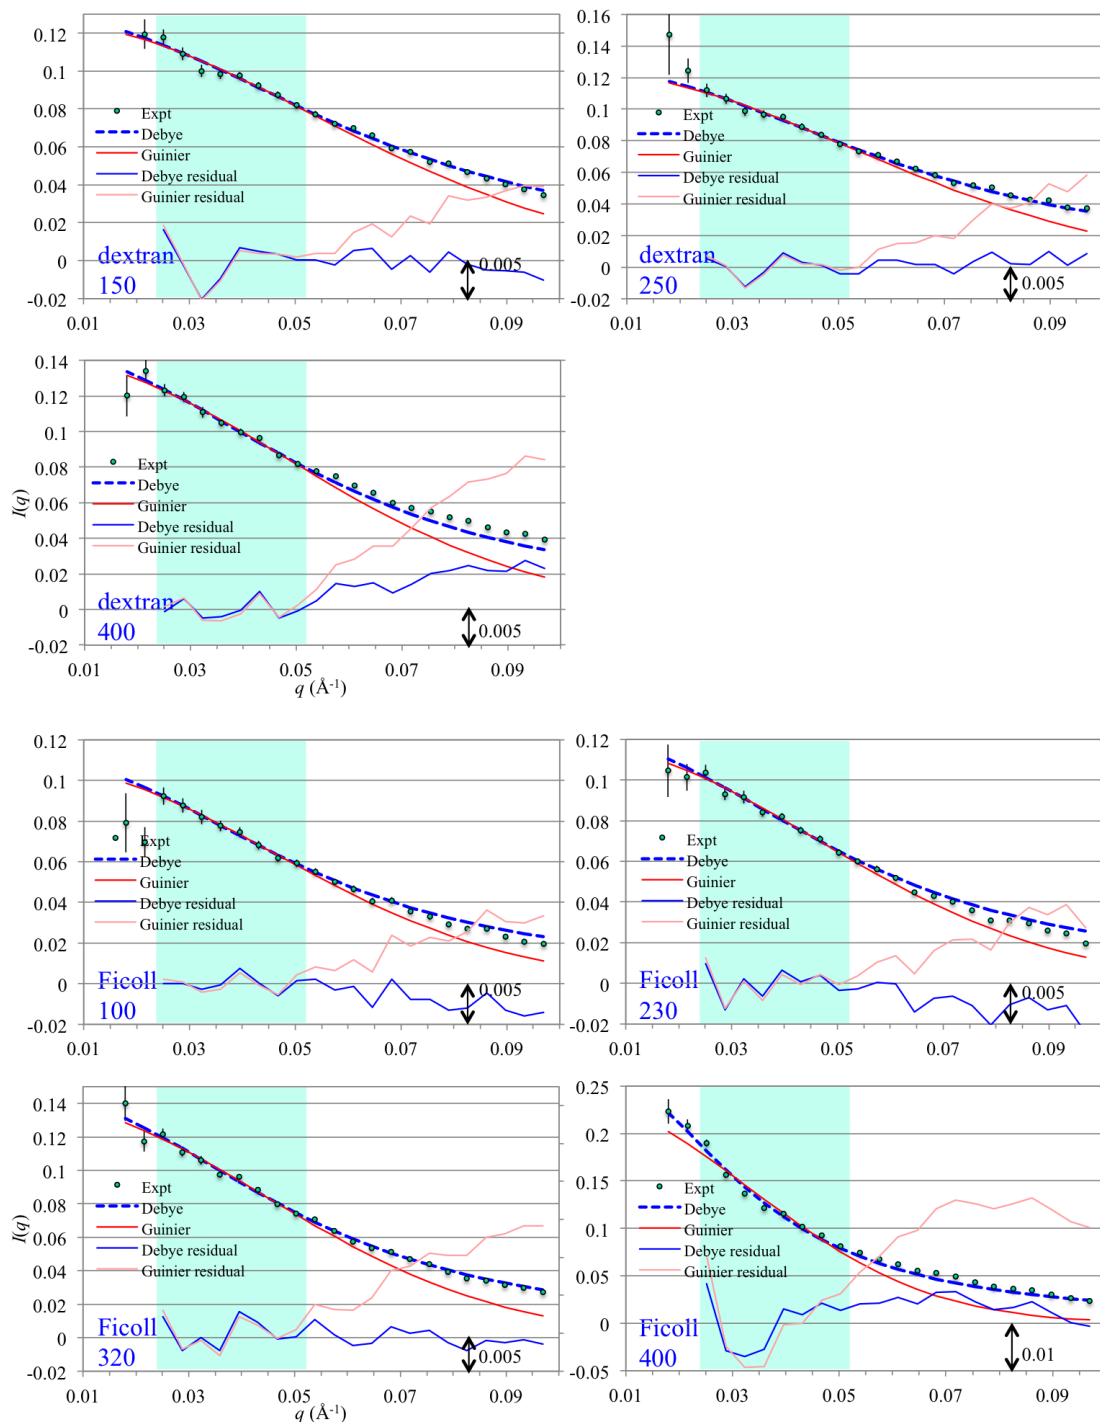

**Figure S4.** Debye and Guinier fits to data at low  $q$ . The shaded region shows the range of  $q$  used for fitting. The residuals of the fits (experimental – predicted) are also shown, with scales indicated by double-headed arrows. The crowder concentrations in mg/ml are indicated.

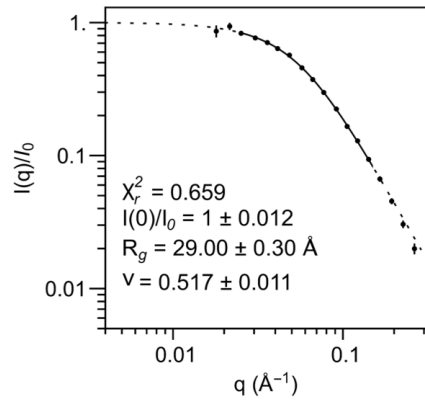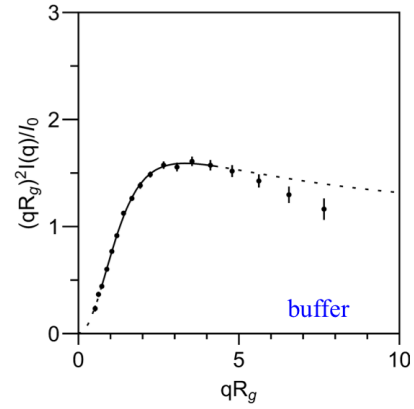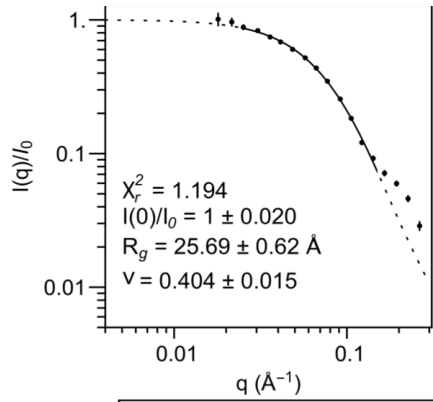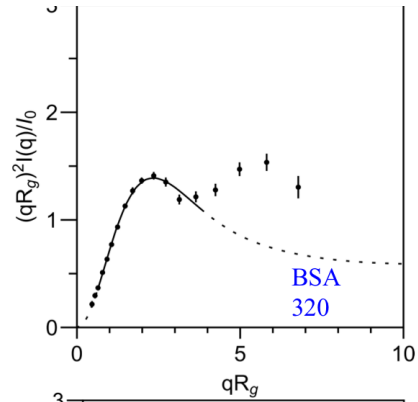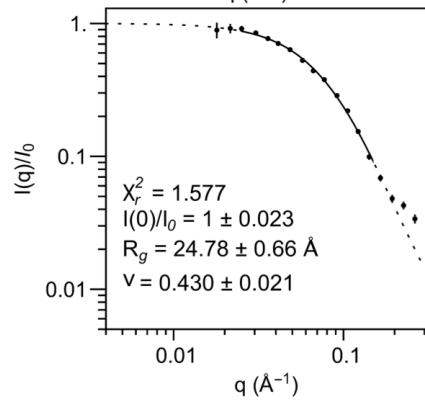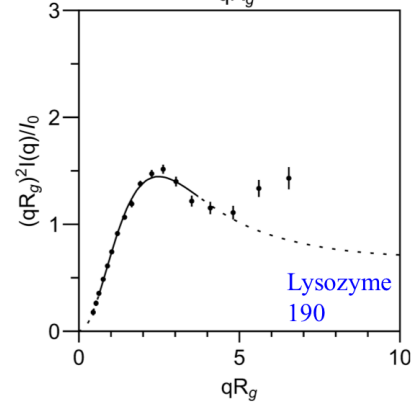



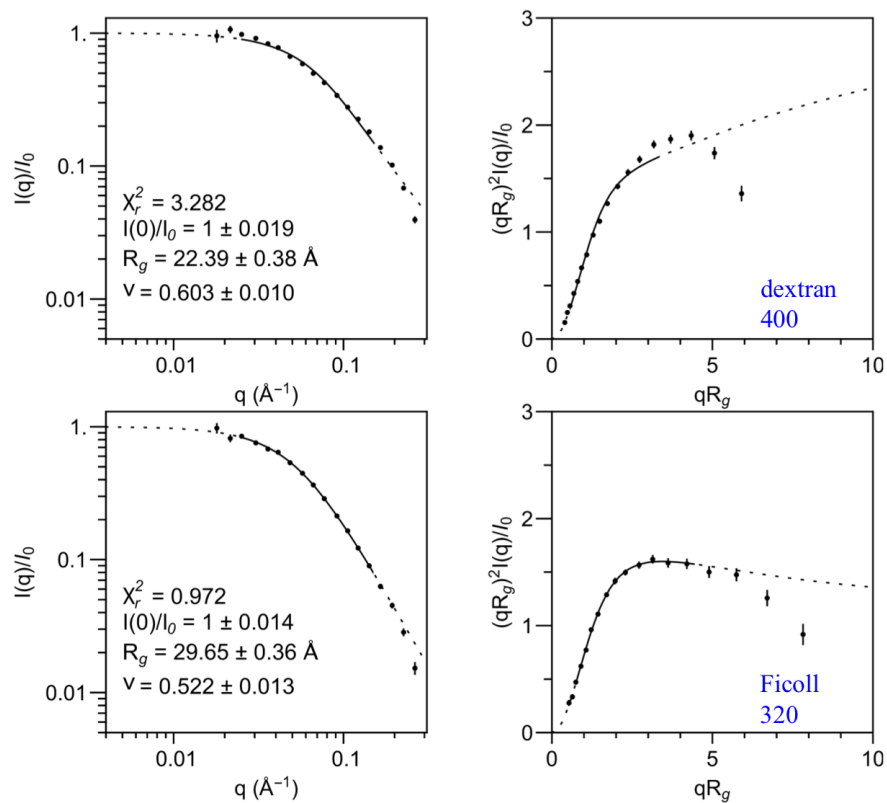

**Figure S5.** Fits of the FlgM data to the model of Riback et al., shown as log-log plot (left) and Kratky plot (right). The fitted curves are shown as solid in range of  $q$  (0.021 to  $0.15 \text{ \AA}^{-1}$ ) used for fitting. The crowder concentrations in mg/ml are indicated.

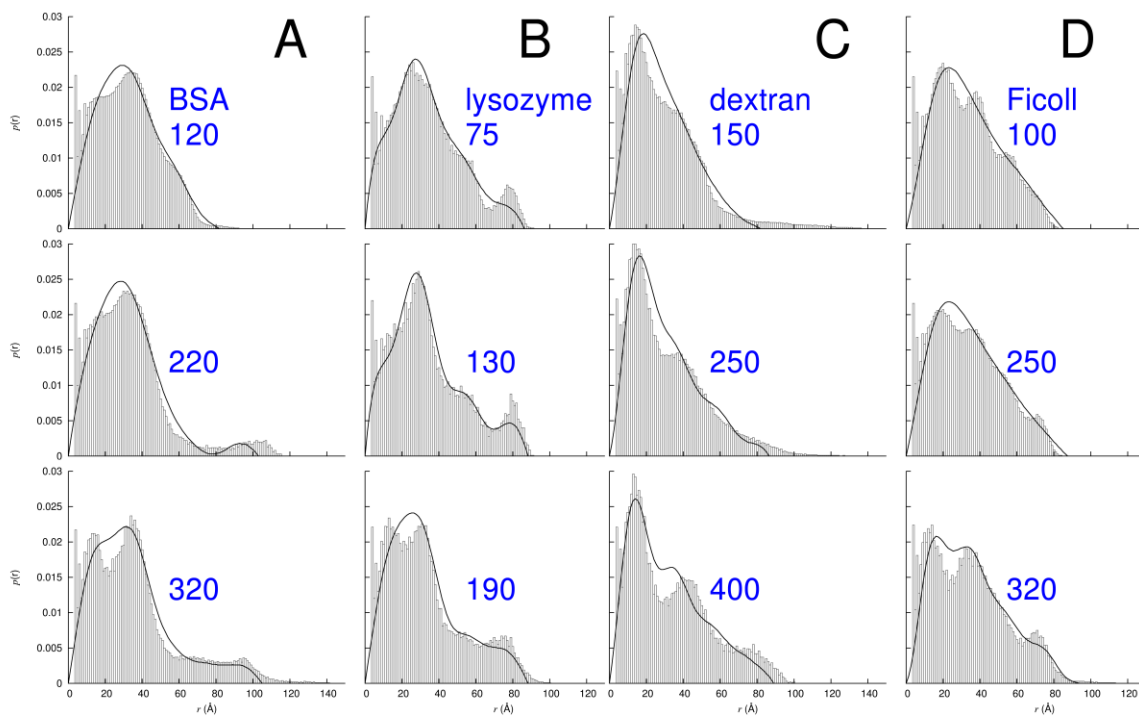

**Figure S6.** Comparison of distance distribution functions calculated from EOM structural models and generated by GNOM.  $r$  refers to  $C\alpha-C\alpha$  distance;  $p(r)$  is the probability density. (A) BSA. (B) Lysozyme. (C) Dextran. (D) Ficoll. The crowder concentrations in mg/ml are indicated.

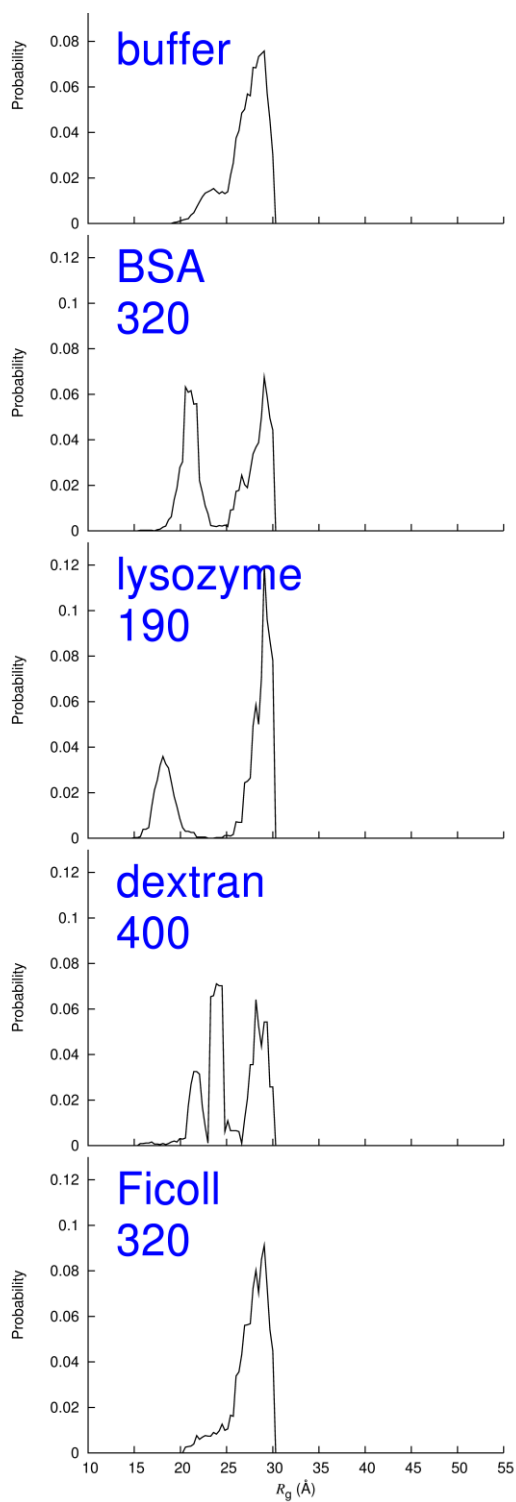

**Figure S7.**  $R_g$  distributions in buffer and under crowding, determined by EOM while removing from the initial pool all structural models with  $R_g > 30 \text{ \AA}$ . The crowder concentrations in mg/ml are indicated.
